# Supplementary material for: Local temperature reduction induced crystallization of MASnI3 and achieving a direct wafer production
Source: Royal Society of Chemistry journal article supplement (doi:10.1039/c7ra07101a), 2017-01-01
Supplement: c7ra07101a1.pdf [file c7ra07101a1.pdf]

## Supporting Information

### Local Temperature Reduction Induced Crystallization of $\text{MASnI}_3$ and Achieving a Direct Wafer Production

Zhun Yao<sup>a</sup>, Zhou Yang <sup>\*a</sup>, Yucheng Liu<sup>a</sup>, Wangen Zhao<sup>a</sup>, Xiaorong Zhang<sup>a</sup>, Bin Liu<sup>a</sup>, Huan Wu<sup>a</sup>, and Shengzhong (Frank) Liu<sup>\*ab</sup>

<sup>a</sup>Key Laboratory of Applied Surface and Colloid Chemistry, National Ministry of Education; Shaanxi Engineering Lab for Advanced Energy Technology, School of Materials Science and Engineering, Shaanxi Normal University, Xi'an 710119, China.

<sup>b</sup>Dalian National Laboratory for Clean Energy; iChEM, Dalian Institute of Chemical Physics, Chinese Academy of Sciences, Dalian, 116023, China.

\*Corresponding author: zhou Yang, [zyang@snnu.edu.cn](mailto:zyang@snnu.edu.cn); Shengzhong (Frank) Liu, [szliu@dicp.ac.cn](mailto:szliu@dicp.ac.cn)

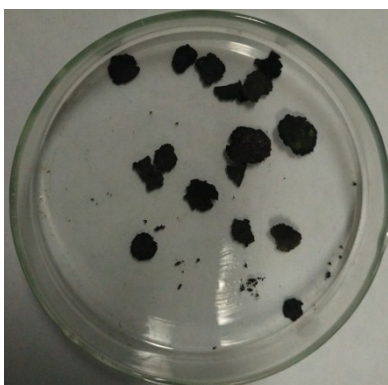

**Fig. S1.** Photo pictures of the wafers fetched from the bottom of the precursor solution.

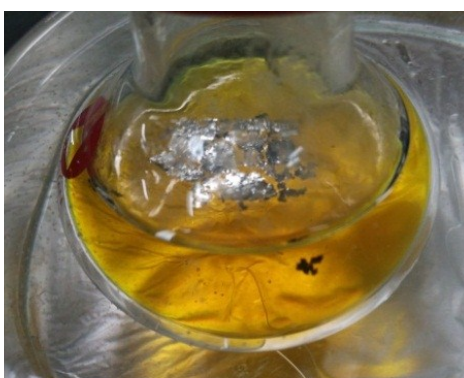

**Fig. S2.** Cool water drop induced crystallization and wafer production of MASnI<sub>3</sub>

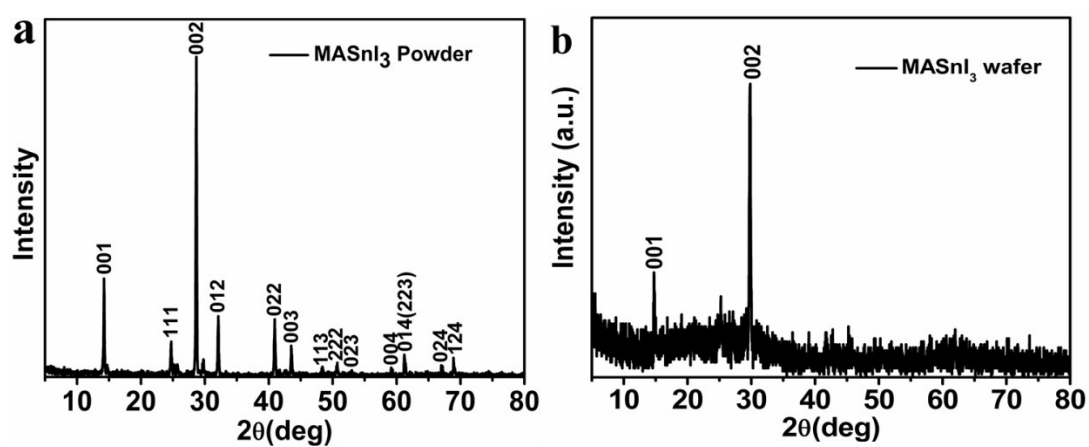

**Fig. S3.** X-ray diffraction patterns of MASnI<sub>3</sub> powder and MASnI<sub>3</sub> wafer obtained by cool water drop induced crystallization of MASnI<sub>3</sub>.

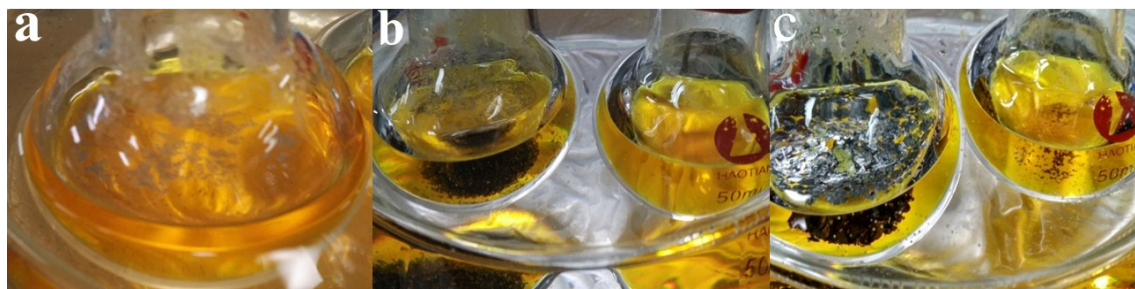

**Fig. S4.** Diethyl ether anhydrous drop induced crystallization of  $\text{MASnI}_3$  wafer.

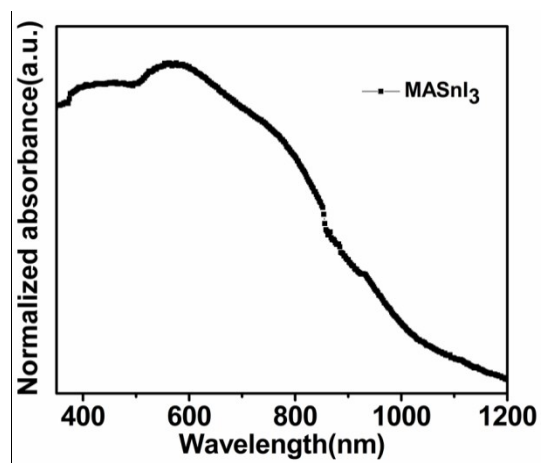

**Fig. S5.** UV-vis-NIR absorption spectrum of  $\text{MASnI}_3$  wafer fabricated by cool water drop induced crystallization.
